# Supplementary material for: Diffuse Large B Cell Lymphoma Cell Line U-2946: Model for MCL1 Inhibitor Testing
Source: PLoS One. 2016 Dec 1;11(12):e0167599. doi: 10.1371/journal.pone.0167599 (PMC5132233; doi:10.1371/journal.pone.0167599)
Supplement: S1 Table — (XLSX) [file pone.0167599.s006.xlsx]

## Sheet: Tabelle1
S1 Table. Primers for genomic PCR.
ABL1 exon 2	forward	5´- GTG GCC AGT GGA GAT AAC AC - 3´
ABL1 intron 2	reverse	5´- CGC AAT TCC CAG ATT TCT ATC - 3´
BCL2 intron 1	forward	5´- CCA GGT TGG GTC TTG ACA G - 3´
BCL2 intron 1	reverse	5´- ATG ATG CCC TTG GTC TTC TGT - 3´
MAP2K3 exon 5	forward	5´- TGA ACT CAC AGG AGC AGA AG -3´
MAP2K3 exon 5	reverse	5´- CGT AGA AGG TGA CAG TGT AG - 3´
MCL1 exon 1	forward	5´- TGG CGT GCA GCG CAA CC - 3´
MCL1 intron 1	reverse	5´- GGA GTG AGG CCT TGG CG - 3´
Sequence of primers for genomic PCR.
