# Supplementary material for: Diffuse Large B Cell Lymphoma Cell Line U-2946: Model for MCL1 Inhibitor Testing
Source: PLoS One. 2016 Dec 1;11(12):e0167599. doi: 10.1371/journal.pone.0167599 (PMC5132233; doi:10.1371/journal.pone.0167599)
Supplement: S2 Table — Outliers are listed according to chromosomal position. Note the perfect correlation between genomic imbalances and expression in cell line U-2946, 6/6 hemiploid genes (black and bold) being repressed, 5/5 amplified genes (red and bold) being overexpressed. Up, higher than average; down, lower than average. (XLSX) [file pone.0167599.s007.xlsx]

## Sheet: Tabelle1
S2 Table. 46 outliers in U-2946 vs. 55 -B-lymphoma cell lines.
#	locus	gene	ploidy	up / down
1	1q21.3	ENSA	6n	up
2	2p22.1	SLC8A1-AS1	2n	up
3	2p25.2	SOX11	2n	up
4	2q11.2	NOAS2	2n	up
5	2q11.2	ZAP70	2n	up
6	2q24.3	SCN3A	2n	up
7	2q35	IGFBP2	2n	up
8	2q37.3	IQCA1	2n	up
9	3p24.3	DAZL	2n	up
10	3q21.1	MYLK	2n	up
11	4q31.1	MGARP	2n	up
12	5p12	CCDC152	2n	up
13	5p13.1	C9	2n	up
14	5q11.2	ARL15	2n	up
15	5q21.3	EFNA5	2n	up
16	6p21.33	ZBTB12	2n	up
17	9p22.1	DENND4C	1n	down
18	10q24.1	DNTT	2n	up
19	10q25.2	RBM20	2n	up
20	11p15.3	GALNT18	2n	up
21	11q13.1	NAALADL1	2n	up
22	12p13.12	LOC100506314	2n	up
23	12p13.31	KLRF1	2n	up
24	12q15	BEST3	2n	up
25	12q15	CPM	2n	up
26	12q24.23	RFC5	2n	down
27	13q13.3	TRPC4	2n	up
28	14q32.33	TMEM121	3n	up
29	15q21.3	PYGO1	2n	up
30	15q23	CORO2B	2n	up
31	15q26.3	ADAMTS17	2n	up
32	15q26.3	SYNM	2n	up
33	17p11.2	TMEM11	10n	up
34	17p11.2	USP22	9n	up
35	17p11.2	ULK2	4n	up
36	17q12	PSMB3	1n	down
37	17p13.2	MIS2	1n	down
38	17q21.2	TUBG1	1n	down
39	17q21.2	PSMC3IP	1n	down
40	17q21.31	C17orf104	2n	up
41	17q21.31	VPS25	1n	down
42	17q22	HSF5	2n	up
43	19q13.32	PNMAL1	2n	up
44	22q12.1	MIAT	2n	up
45	Xq21.32	NAP1L3	1n	up
46	Xq22.1	GPRASP1	1n	up
Haploid genes, bold black; polyploid genes, bold red.
