# Supplementary material for: Diffuse Large B Cell Lymphoma Cell Line U-2946: Model for MCL1 Inhibitor Testing
Source: PLoS One. 2016 Dec 1;11(12):e0167599. doi: 10.1371/journal.pone.0167599 (PMC5132233; doi:10.1371/journal.pone.0167599)
Supplement: S3 Table — Amplified genes on 1q21.3 are listed from centromere to telomere, genes on 17p11.2 from telomere to centromere. Bold: strongly expressed genes as assessed by expression array analysis. (XLSX) [file pone.0167599.s008.xlsx]

## Sheet: Tabelle1
S3 Table. Amplified genes in cell line U-2946.
amplified on 1q21.3	ploidy
TARS2	4n
ECM1	4n
LINC00568	5n
ADAMTSL4	6n
MCL1	6n
ENSA	6n
GOLPH3L	3n
amplified on 17p11.2	ploidy
MFAP4	3n
RNF112	3.5n
SLC47A1	4n
ALDH3A2	4n
SLC47A1	4n
ALDH3A1	4n
ULK2	4n
AKAP10	4n
SPECC1	4n
CCDC144CP	3n
LGALS9B	3n
KRT16P3	3n
CDRT15L2	4n
CCD144NL	6n
USP22	10n
DHRS7B	12n
TMEM11	12n
C17orf103	11n
MAP2K3	6n
KCNJ12	3n
C17orf51	3n
MCL1 and MAP2K3 (bold) were subject of further analyses.
